# Supplementary material
Source: publisher figshare collection journal article supplement (https://rs.figshare.com/ndownloader/files/18137090)
Supplement: Supplementary file 1 [file 18137090]

## Sheet: Sheet1
Supplementary Table 3. Table of protein-coding human intelligence-related SNPs detected in juvenile Area X modules. Primary juvenile Area X module assignment is listed under "module.x". Gene significance score for the variability induction paradigm is listed under "gs.ns.ud.entropy.effect" (column heading preserved from original publication in Burkett et al. 2018). FDR corrected p value q is list…
Human homolog	module.x	gs.ns.ud. entropy.effect	q.gs.ns.ud. entropy.effect
AKAP6	green	-0.314	0.132333
ANAPC4	black	-0.463	0.0532044
ATXN1L	darkgreen	0.19	0.226973
BRWD1	turquoise	-0.577	0.020674
BSN	white	-0.00407	0.377913
CELSR3	lightgreen	-0.00126	0.380078
CHST10	turquoise	-0.67	0.00773794
CRTC2	magenta	0.521	0.0343856
DBN1	brown	0.504	0.039279
DDX27	midnightblue	0.267	0.166236
DMXL2	greenyellow	-0.0146	0.369023
ERLIN1	blue	0.11	0.293187
GBF1	white	-0.544	0.0279831
GCAT	greenyellow	0.0752	0.321318
GNL3	turquoise	-0.303	0.140119
GPD2	white	-0.0506	0.341225
IP6K2	turquoise	-0.541	0.029021
L3MBTL2	white	-0.366	0.099787
LAMB2	red	-0.0783	0.318703
LONRF2	green	0.000145	0.380633
MAST3	white	0.328	0.123428
METTL13	red	0.0256	0.36039
MTCH2	red	0.0786	0.318469
MTMR4	white	0.313	0.133138
NCAPG	turquoise	-0.68	0.00708767
NEK4	pink	-0.604	0.0157623
NFATC3	turquoise	-0.409	0.0766913
NT5DC2	white	-0.166	0.245989
OSBP2	brown	0.431	0.066453
PAM	green	-0.0974	0.303736
PPIP5K2	darkgrey	0.565	0.0231209
PRMT7	white	-0.185	0.230432
RBL2	orange	-0.612	0.0144873
RBM39	grey60	0.339	0.116006
RNF123	white	-0.331	0.12206
SEMA3F	orange	-0.316	0.131326
SHISA4	darkturquoise	0.379	0.0924151
SLC7A6OS	lightgreen	0.108	0.295239
ST3GAL3	white	-0.344	0.112974
STAB1	white	-0.499	0.0411475
SYNGR1	white	0.0907	0.308792
TET2	royalblue	0.274	0.161473
TNIP2	black	-0.682	0.00699311
TRIOBP	white	0.204	0.215384
TTC29	midnightblue	-0.422	0.0702508
USP19	red	-0.13	0.277112
USP4	black	-0.596	0.0170802
WBP2NL	white	-0.331	0.121517
WDR55	magenta	0.213	0.208546
ZNF638	brown	-0.0545	0.337836
ZNFX1	darkgreen	0.689	0.00636315
